# Supplementary material for: Galectin-8 Favors the Presentation of Surface-Tethered Antigens by Stabilizing the B Cell Immune Synapse
Source: PubMed Central journal article supplement — Cell Rep. 2018 Dec 11;25(11):3110–3122.e6. doi: 10.1016/j.celrep.2018.11.052 (PMC6302547; doi:10.1016/j.celrep.2018.11.052), 2018-12-11
Supplement: mmc1.pdf [file mmc1.pdf]

**Cell Reports, Volume 25**

**Supplemental Information**

**Galectin-8 Favors the Presentation  
of Surface-Tethered Antigens by Stabilizing  
the B Cell Immune Synapse**

**Dorian Obino, Luc Fetler, Andrea Soza, Odile Malbec, Juan José Saez, Mariana Labarca, Claudia Oyanadel, Felipe Del Valle Batalla, Nicolas Goles, Aleksandra Chikina, Danielle Lankar, Fabián Segovia-Miranda, Camille Garcia, Thibaut Léger, Alfonso Gonzalez, Marion Espéli, Ana-Maria Lennon-Duménil, and Maria-Isabel Yuseff**

## SUPPLEMENTAL FIGURES

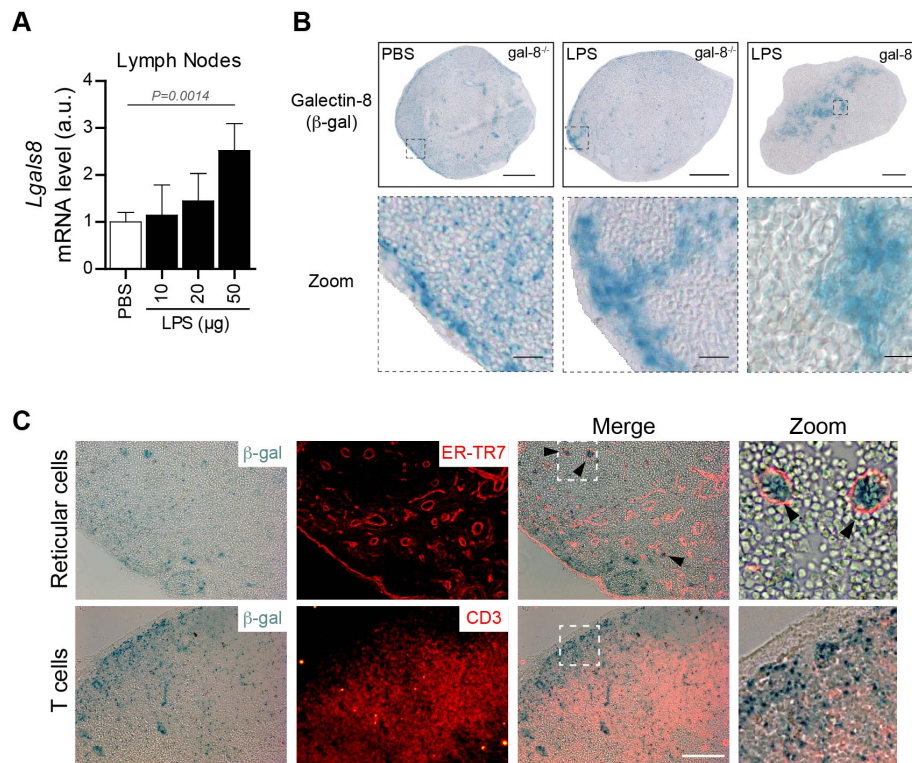

**Figure S1. Galectin-8 is expressed in lymphoid tissues. Related to Figure 1. (A)** Quantitative RT-PCR analysis of *Lgals8* mRNA levels in peripheral lymph nodes of C57BL/6 mice 6h following retro-orbital injection of PBS (vehicle control) or indicated doses of LPS. Values were normalized with respect to the mean PBS value per replicate. n=3 to 5 mice per condition pooled from N=4 independent experiments. Analysis of variance (ANOVA test) was used to assess statistical significance. **(B)** Representative images of  $\beta$ -galactosidase staining of LN cryosections from mice bearing a LacZ expression cassette at the *Lgals8* locus 6h following injection of PBS (vehicle control) or LPS (50  $\mu$ g) in the tail vein. Scale bar, 500 $\mu$ m. Zooms highlight the increase in  $\beta$ -galactosidase staining within different areas upon inflammation. Scale bar, 50 $\mu$ m. **(C)** Representative images of popliteal lymph node sequential cryosections from mice bearing a LacZ expression cassette at the *Lgals8* locus stained for  $\beta$ -galactosidase (blue) and either reticular cells (ER-TR7) or T cells (CD3), both shown in red. Scale bar, 200  $\mu$ m. Arrowheads highlight  $\beta$ -galactosidase staining within the vasculature.

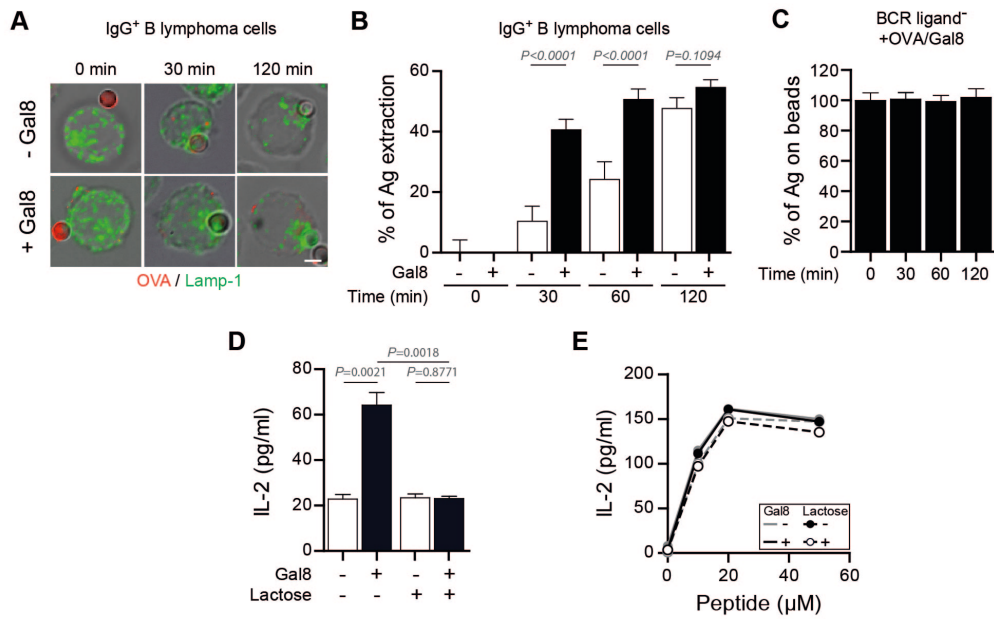

**Figure S2. Galectin-8 promotes efficient antigen extraction and presentation by B lymphoma cells *in vitro*. Related to Figure 5.** (A) Representative images of B lymphoma cells incubated with BCR-ligand<sup>+</sup> beads plus the model antigen OVA in the presence or not of Galectin-8 for indicated time. Scale bar, 3  $\mu$ m. (B) Quantification of the percentage of antigen (OVA) extracted from beads following incubation of B lymphoma cells with BCR-ligand<sup>+</sup> beads plus OVA in the presence or not of Galectin-8 for indicated time. Values were normalized with respect to Ag-coated beads not engaged with B cells.  $n > 40$  cells pooled from  $N = 3$  independent experiments. (C) Quantification of the amounts of antigen (OVA) remaining on beads following incubation of B lymphoma with BCR-ligand<sup>-</sup> beads plus OVA/Gal8 for indicated time.  $n > 20$  cells pooled from 2 independent experiments. (D) Antigen presentation assay of B lymphoma cells stimulated with BCR-ligand<sup>+</sup> beads containing Lack $\pm$ Gal8 in the presence or not of 100 mM lactose. Data represent the mean  $\pm$  SEM of triplicate and are representative of  $N = 3$  independent experiments. Unpaired t-test. (E) Peptide control for cells used in the antigen presentation assay shown in (D). Graph shows the mean of duplicates and is representative of 3 independent experiments.

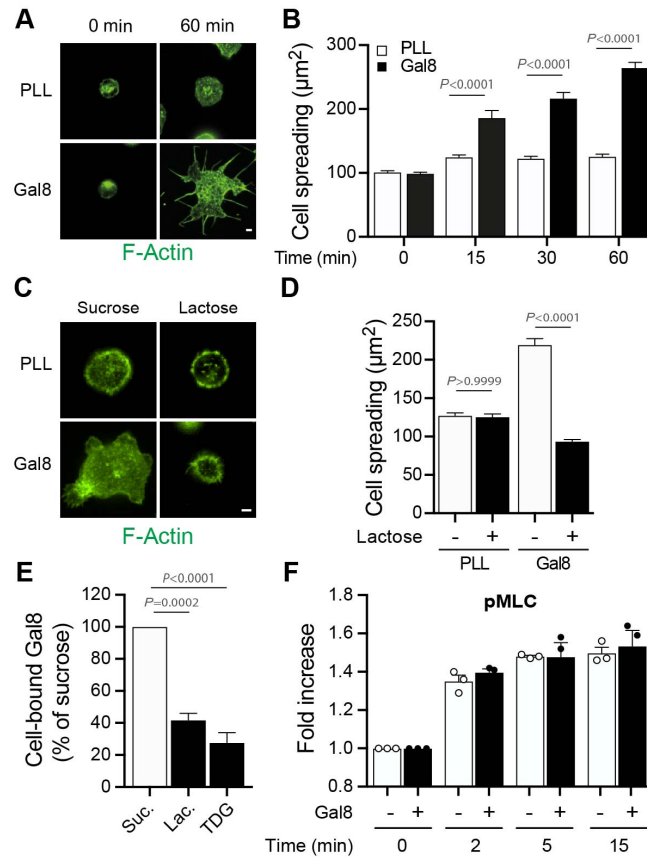

**Figure S3. Galectin-8 enhances B cell spreading but not contractility. Related to Figure 5.** (A) Representative images of B lymphoma cells seeded on coverslips coated with poly-L-lysine (PLL) or 20 µg Galectin-8 (Gal8) for indicated time and stained for F-Actin (Phalloidin, green). Scale bar, 3 µm. (B) Quantification of the spreading area of cells shown in (A). n>90 cells pooled from N=3 independent experiments. (C) Representative images of B lymphoma cells seeded on coverslips coated with poly-L-lysine (PLL) or 20 µg Galectin-8 (Gal8) in presence of 100 mM sucrose (control) or lactose for 60 min and stained for F-Actin (Phalloidin, green). Scale bar, 3 µm. (D) Quantification of the spreading area of cells shown in (C). n>50 cells pooled from N=2 independent experiments. (E) AlexaFluor488-conjugated recombinant Galectin-8 was pre-treated with 20 mM sucrose (Suc.), lactose (Lac.) or thiodigalactoside (TDG) for 30 min prior to be incubated with B lymphoma cells for 60 min, washed and the cell-bound fraction of AlexaFluor488-Gal8 detected by flow cytometry. Values were normalized with respect to the sucrose condition in each experimental replicate. Data are pooled from N=3 independent experiments. (F) Flow cytometry analysis of the phosphorylation status of Myosin Regulatory Light Chain (pMLC) upon stimulation of B lymphoma cells with BCR-ligand<sup>+</sup> beads containing or not Galectin-8 for indicated times. Values were normalized with respect to the time 0 min per condition and experimental replicate. Data are pooled from N=3 independent experiments. An analysis of variance (ANOVA test) followed by a Sidak's multiple comparison test (B, D-E) and a ratio paired t-test (F) were used to assess statistical significance.

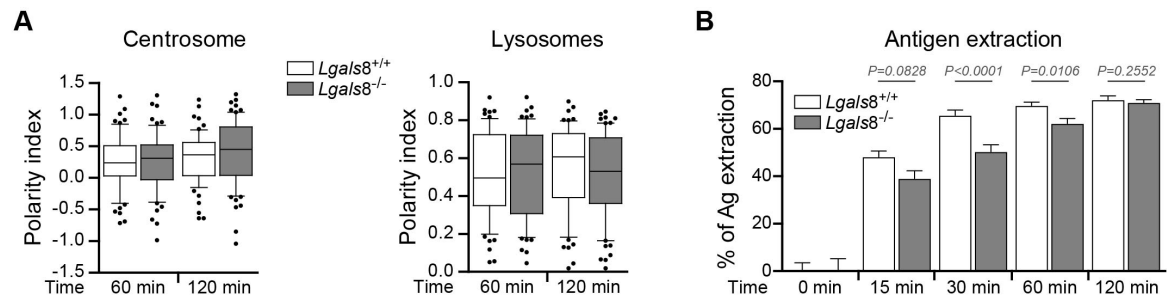

**Figure S4. The lack of Galectin-8 does not impair B cell polarization and function. Related to Figure 5. (A)** Quantification of centrosome and lysosome polarity indexes of spleen B cells purified from  $Lgals8^{+/+}$  (white) and  $Lgals8^{-/-}$  (grey) mice and stimulated for 60 min or 120 min with BCR-ligand<sup>+</sup> beads.  $n>60$  cells per condition and time point and are pooled from  $N=2$  independent experiments. Unpaired t-test (centrosome) and Mann-Whitney test (lysosomes) were used to assess statistical significance. **(B)** Antigen (OVA) extraction assay with  $Lgals8^{+/+}$  (white) and  $Lgals8^{-/-}$  (grey) spleen B cells stimulated with BCR-ligand<sup>+</sup> beads containing OVA for indicated time. Bars show the mean $\pm$ SEM with  $n>55$  cells per condition and time point pooled from  $N=2$  independent experiments. Mann-Whitney test was used to assess statistical significance.
